# Supplementary material
Source: publisher figshare collection journal article supplement (https://karger.figshare.com/ndownloader/files/18107444)
Supplement: Supplementary file 1 [file 18107444]

**Supplementary table 1.** Genotype and allele frequencies of rs 7799039 and rs 2167270 in the leptin gene in obese and the morbid obese study groups.

| **SNP** | **Genotype** | **Obese n (%)** | **Morbid obese n (%)** |  |
| --- | --- | --- | --- | --- |
| rs7799039 | A/G | 143 (50.0) | 102 (46.8) |  |
|  | A/A | 61 (21.3) | 53 (24.3) |  |
|  | G/G | 82 (28.7) | 63 (28.9) | p = 0.687 |
|  | (G) | 0.54 | 0.48 |  |
|  | (A) | 0.46 | 0.52 |  |
| rs2167270 | A/G | 136 (47.7) | 99 (45.6) |  |
|  | A/A | 40 (14.0) | 31 (14.3) |  |
|  | G/G | 109 (38.3) | 87 (40.1) | p = 0.882 |
|  | (G) | 0.62 | 0.63 |  |
|  | (A) | 0.38 | 0.37 |  |
